# Supplementary material
Source: publisher figshare collection journal article supplement (https://acs.figshare.com/ndownloader/files/15136292)
Supplement: Supplementary file 1 [file 15136292]

## Supporting information

### Quantum Dot Donor-Polymer Acceptor Architecture for a FRET Enabled Solar Cell

Ramesh K. Kokal,<sup>a,†</sup> Sai Santosh Kumar Raavi,<sup>b,†</sup> Melepurath Deepa,<sup>a,†,\*</sup>

<sup>a</sup>Department of Chemistry, <sup>b</sup>Department of Physics, <sup>†</sup>Indian Institute of Technology Hyderabad, Kandi,  
Sangareddy, Telangana (India)-502285

\*Email: mdeepa@iith.ac.in Tel: +91-40-23016024, Fax: +91-40-23016003.

| S. No. | Content                                                      | Page no. |
|--------|--------------------------------------------------------------|----------|
| 1      | XRD patterns of pristine- TiO <sub>2</sub> , PCDTBT and CdS  | S3-S4    |
| 2      | Mott-Schottky plot of PCDTBT                                 | S5       |
| 3      | Cyclic voltammograms of TiO <sub>2</sub> , PCDTBT, and CdS   | S6-S7    |
| 4      | Fluorescence quenching and lifetime table                    | S8-S9    |
| 5      | Table of quantum yield calculation                           | S9       |
| 6      | FRET calculation                                             | S10      |
| 7      | Table of standard solar cell parameters                      | S11-S12  |
| 8      | Error bar plots of QDSCs devices                             | S13      |
| 9      | Fitting parameters for EIS spectra of symmetric cells of CEs | S14      |

The XRD patterns of pristine-  $\text{TiO}_2$ , PCDTBT and CdS are shown in Figure S1. The XRD pattern of pristine  $\text{TiO}_2$  shows peaks at  $d = 3.51, 2.42, 2.37, 1.88, 1.69, 1.66, 1.48$  and  $1.26 \text{ \AA}$  which correspond to the (101), (103), (004), (200), (105) (211), (204) and (215) planes of the tetragonal symmetry of body centered cubic lattice, in concurrence with the PDF (powder diffraction file) # 89-4921. The XRD pattern of CdS QDs grown on a glass plate by a SILAR process shows two broad low intensity peaks at  $2\theta = 26.45^\circ$  ( $d = 3.37 \text{ \AA}$ ) and at  $2\theta = 43.87^\circ$  ( $d = 2.06 \text{ \AA}$ ) and these are assigned to the (111) and (220) reflections of the face centered cubic (fcc) lattice of CdS (PDF # 65-2887). The broadness of the peaks indicates the semi-crystalline nature of the CdS QDs. PCDTBT shows a few broad peaks.

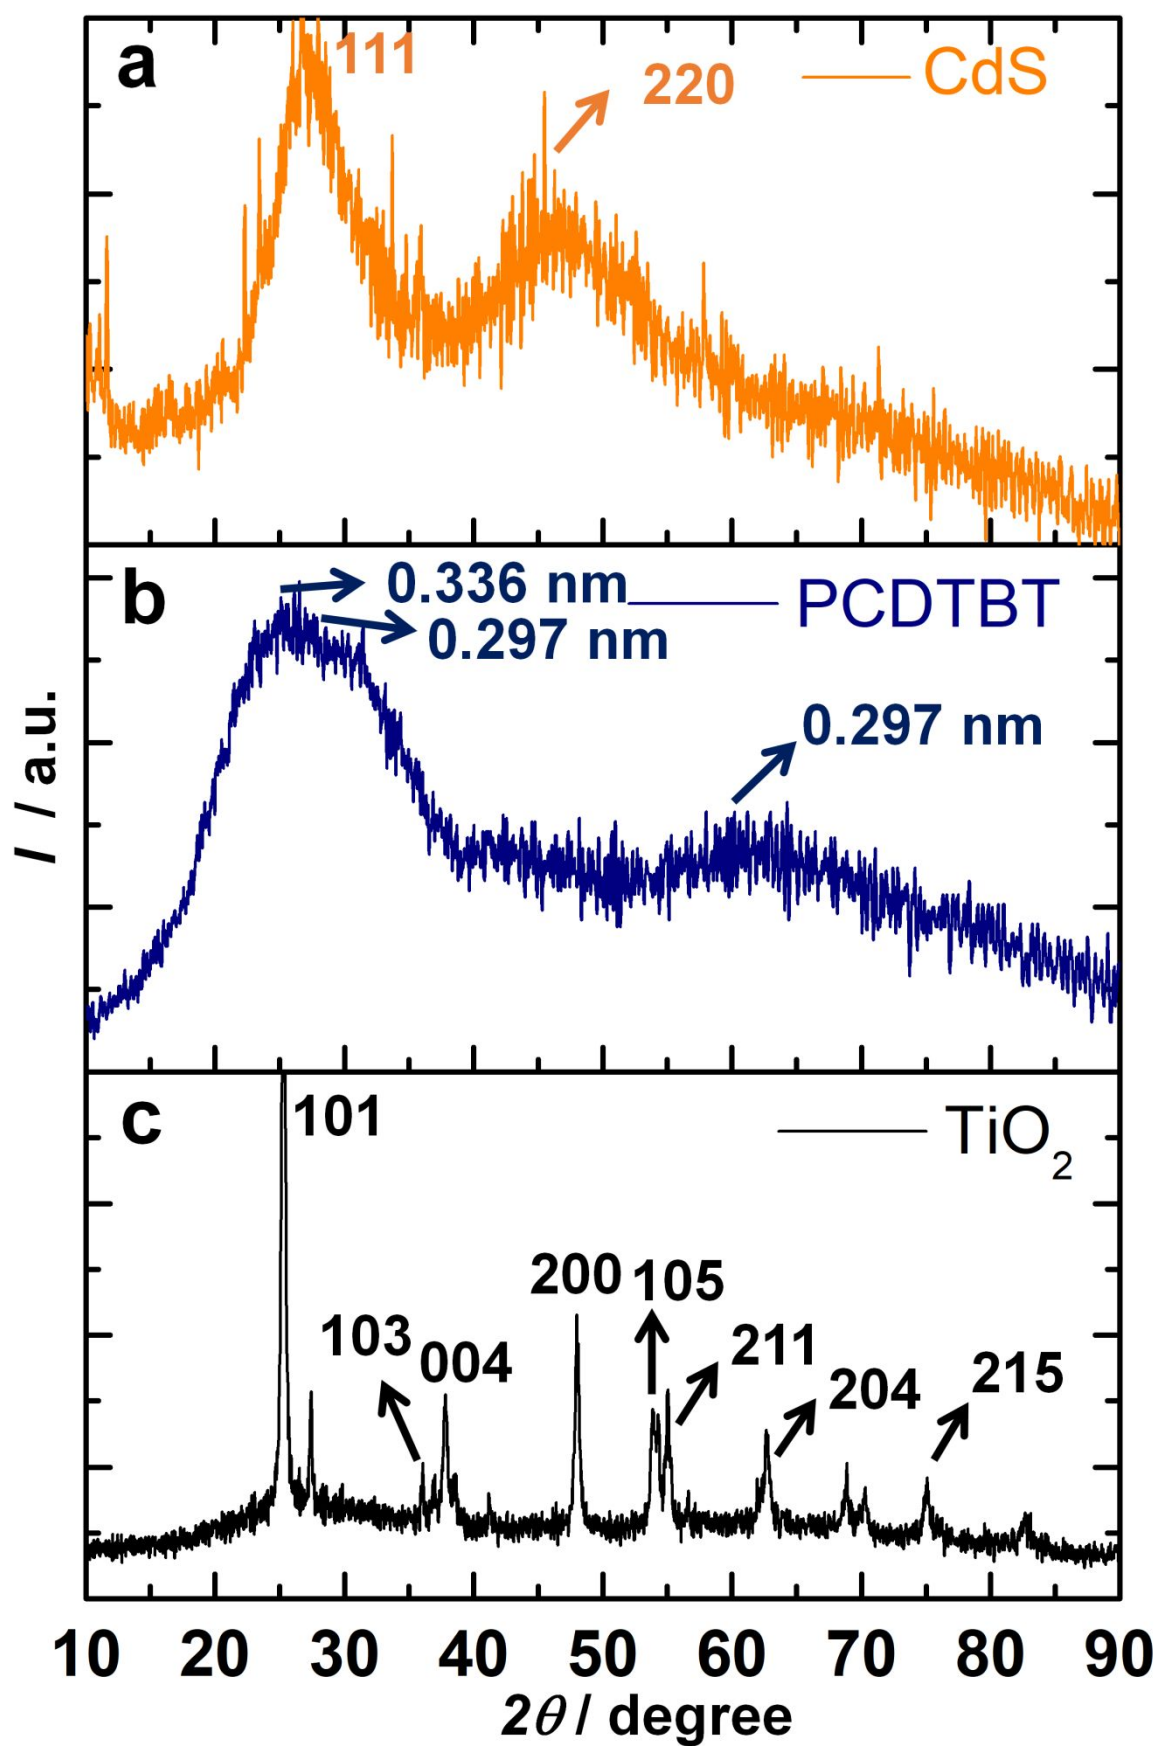

**Figure S1** XRD patterns of (a) CdS QDs, (b) PCDTBT and (c) pristine  $\text{TiO}_2$ .

### Mott-Schottky plots of PCDTBT

To affirm the electron conductivity capability of the PCDTBT polymer, Mott-Schottky plots were recorded in a 0.1 M KCl electrolyte with PCDTBT deposited on FTO electrode as the working electrode, Pt as a counter electrode and Ag/AgCl/KCl as a reference electrode. The Mott-Schottky plots ( $1/C^2$  versus  $E$ ), where  $C$  is the capacitance and  $E$  is the applied bias varied from -1 to +1 V, are obtained for PCDTBT at two different frequencies of 1 Hz and 10 Hz shown in Figure S2. Positive slopes observed for the plots indicating n-type semiconducting with electrons as majority charge carriers.

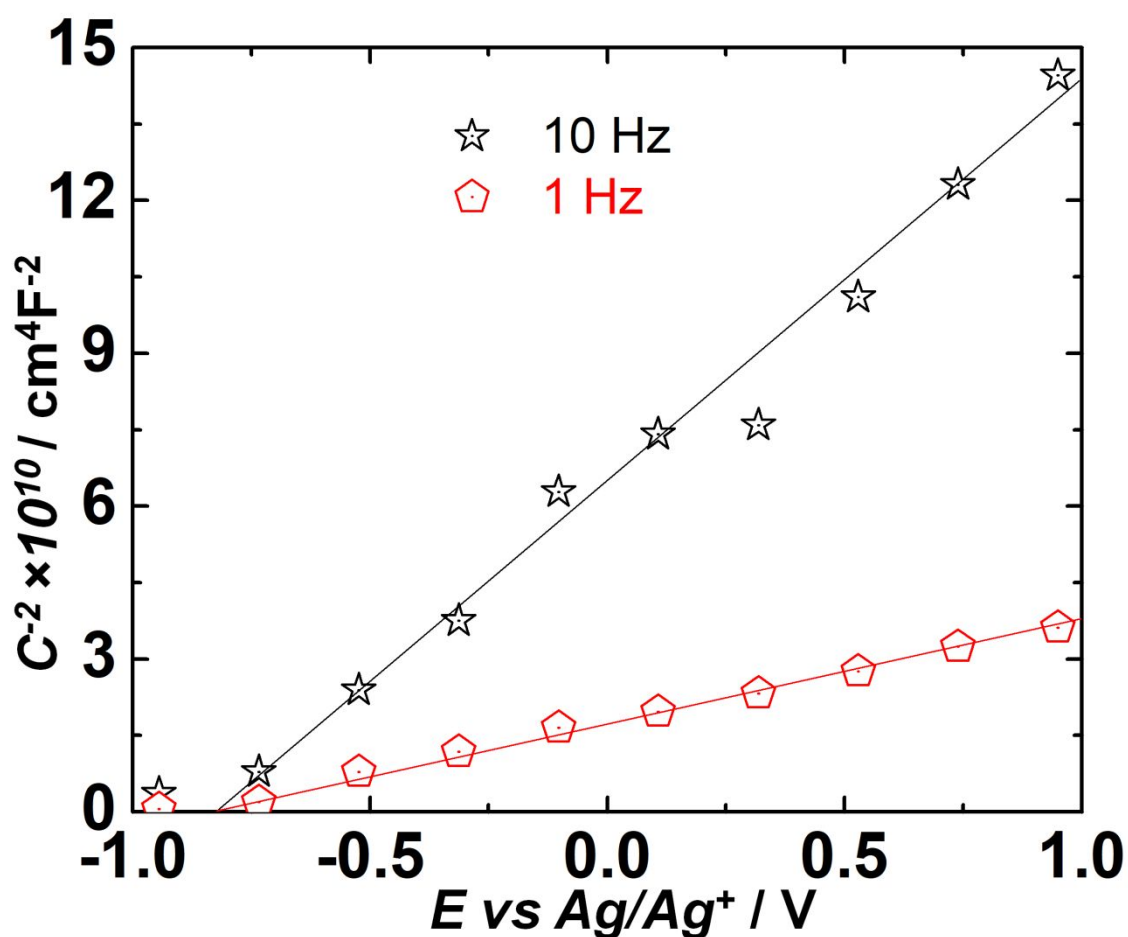

**Figure S2** Mott-Schottky plots of a FTO/PCDTBT film, recorded in 0.1 M KCl in dark, with an Ag/AgCl/KCl as a reference electrode, and a Pt rod as the counter electrode.

## Cyclic voltammetry

Cyclic voltammograms of pristine-  $\text{TiO}_2$ , CdS and PCDTBT films (as working electrodes), recorded in an aqueous 0.1 M KCl solution, with a Pt rod as the counter electrode and a Ag/AgCl/KCl as the reference electrode are shown in Figure S3. For pristine  $\text{TiO}_2$  (Fig. S3a), a reduction peak was observed in the cathodic sweep at  $-0.67 \text{ V}$  *versus* Ag/AgCl/KCl, and this  $E_{\text{red}}$  can be equated to the conduction band (CB) position of  $\text{TiO}_2$ . The electrode potential of the reference is  $+0.197 \text{ V}$ . So,  $E_{\text{red}}$  (*versus* NHE (normal hydrogen electrode)) of  $\text{TiO}_2 = -0.58 \text{ V} + 0.197 \text{ V} = -0.383 \text{ V}$ . The value of  $-0.383 \text{ V}$  (*versus* NHE) in eV is given by:  $-4.5 \text{ eV} (\cong 0 \text{ V} \text{ versus NHE}) - (-0.383 \text{ V}) = -4.117 \cong -4.12 \text{ eV}$ . The position of the valence band (VB) of  $\text{TiO}_2$  is determined by addition of the pre-determined optical band gap energy value to the CB energy, i.e.,  $-4.12 \text{ eV} + (-3.27 \text{ eV}) = -7.39 \cong -7.4 \text{ eV}$ . For PCDTBT electrode (Figure S3b), a reduction peak were observed in the cathodic sweep at  $-1.12 \text{ V}$  *versus* Ag/AgCl/KCl, and this  $E_{\text{red}}$  can be equated to the CB position of PCDTBT. So,  $E_{\text{red}}$  (*versus* NHE) of PCDTBT  $= -1.12 \text{ V} + 0.197 \text{ V} = -0.923 \text{ V}$ . The value of  $-0.923 \text{ V}$  (*versus* NHE) in eV is given by:  $-4.5 \text{ eV} - (-0.923 \text{ V}) = -3.577 \cong -3.6 \text{ eV}$ . By adding the optical  $E_g$  of PCDTBT to the CB energy level ( $-3.6 \text{ eV} + (-1.85 \text{ eV})$ ), the VB energy level is calculated to be at  $-5.45 \text{ eV}$ . For CdS electrode (Figure S3c), a reduction peak was observed in the cathodic sweep at  $-0.783 \text{ V}$  *versus* Ag/AgCl/KCl, and this  $E_{\text{red}}$  can be equated to the CB position of CdS. So,  $E_{\text{red}}$  (*versus* NHE) of CdS  $= -0.783 \text{ V} + 0.197 \text{ V} = -0.586 \text{ V}$ . The value of  $-0.586 \text{ V}$  (*versus* NHE) in eV is given by:  $-4.5 \text{ eV} - (-0.586 \text{ V}) = -3.914 \cong -3.9 \text{ eV}$ . By adding the optical  $E_g$  of CdS to the CB energy level ( $-3.9 \text{ eV} + (-2.26 \text{ eV})$ ), the VB energy level is calculated to be at  $-6.16 \text{ eV}$ .

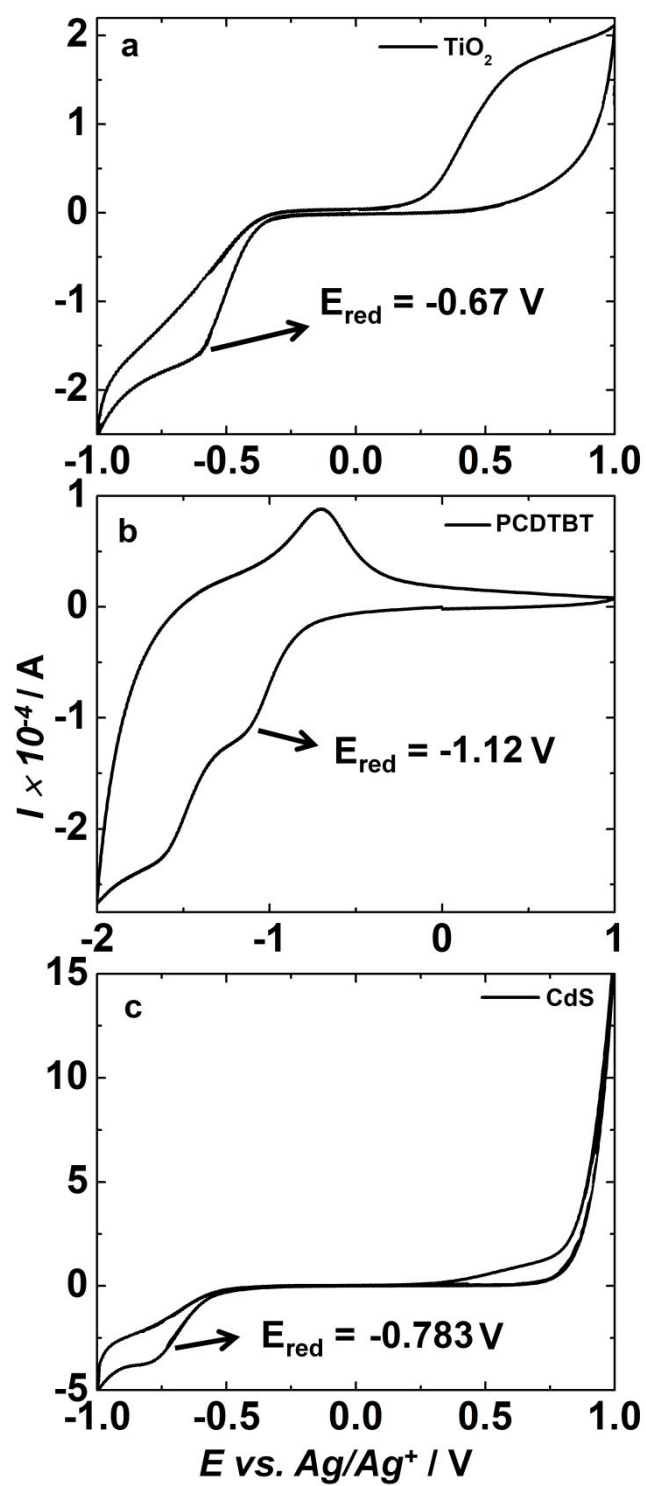

**Figure S3** Cyclic voltammograms of (a)  $\text{TiO}_2$ , (b) PCDTBT, and (c) CdS serving as working

electrodes. All CV plots were recorded in a 0.1 M KCl solution as electrolyte, with a Pt sheet as the counter electrode and an Ag/AgCl/KCl as the reference electrode, at a scan rate of 10

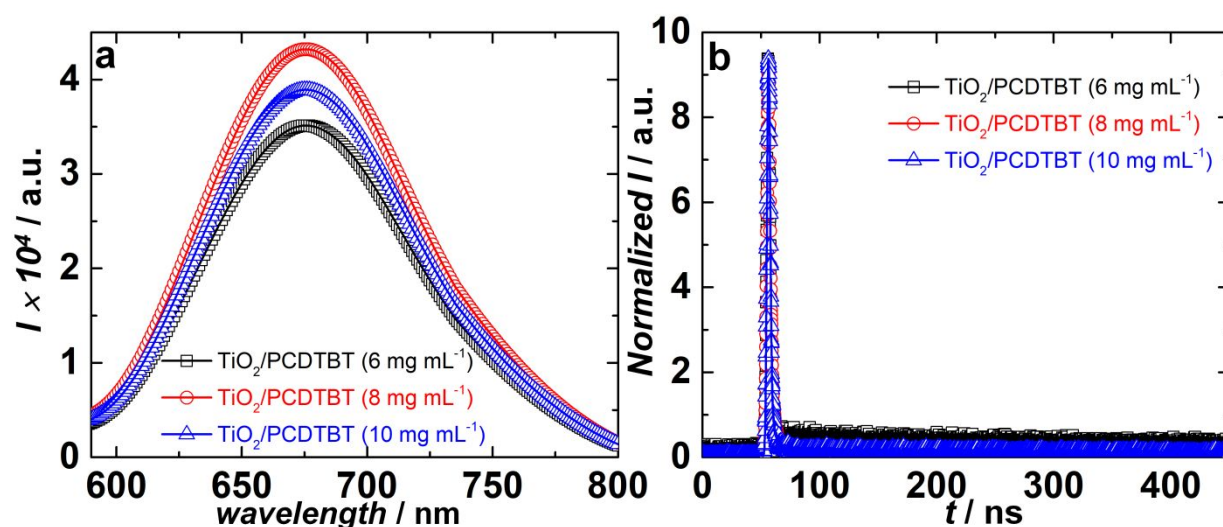

**Figure S4** (a) Fluorescence spectra of TiO<sub>2</sub>/PCDTBT at 6, 8 and 10 mg mL<sup>-1</sup> concentrations of PCEDTBT recorded at  $\lambda_{\text{ex}} = 370$  nm, and corresponding (b) Time resolved fluorescence decay traces recorded at  $\lambda_{\text{ex}} = 370$  nm, and at  $\lambda_{\text{em}} = 660$  nm wavelengths.

mV s<sup>-1</sup>.

Fluorescence quenching for TiO<sub>2</sub>/PCDTBT films at 6, 8 and 10 mg mL<sup>-1</sup> concentrations of PCEDTBT was recorded  $\lambda_{\text{ex}} = 370$  nm at shown in the Figure S4.

**Table S1** Kinetic parameters of emission decay analysis of TiO<sub>2</sub>/PCDTBT films at different concentrations of PCEDTBT deduced from double exponential fits; the  $\lambda_{\text{ex}}$  was fixed at 370 nm and  $\lambda_{\text{em}} = 660$  nm.<sup>a</sup>

| Concentration (mg mL <sup>-1</sup> ) | B <sub>1</sub> | $\tau_1$ (ns) | B <sub>2</sub> | $\tau_2$ (ns) | $\langle\tau\rangle$ (ns) | $\chi^2$ |
|--------------------------------------|----------------|---------------|----------------|---------------|---------------------------|----------|
| 6                                    | 13.0           | 0.9           | 87             | 2.1           | 2.0                       | 1        |
| 8                                    | 65.35          | 0.2           | 34.6           | 2.9           | 2.5                       | 1        |
| 10                                   | 53.3           | 0.05          | 46.7           | 2.2           | 2.2                       | 1        |

<sup>a</sup>B is the relative amplitude of each lifetime,  $\tau_1$  and  $\tau_2$  are the components of fluorescence lifetime and  $\chi^2$  denotes the fit quality.



**Table S2** Kinetic parameters of emission decay analysis of photosensitizers deduced from double/single exponential fits; the  $\lambda_{\text{ex}}$  was fixed at 370 nm for all samples.<sup>a</sup>

| Sample                       | $\lambda_{\text{em}}$ (nm) | B <sub>1</sub> | $\tau_1$ (ns) | B <sub>2</sub> | $\tau_2$ (ns) | $\langle\tau\rangle$ (ns) | $\chi^2$ |
|------------------------------|----------------------------|----------------|---------------|----------------|---------------|---------------------------|----------|
| CdS                          | 520                        | 100            | 11.2          | -              | -             | 11.2                      | 1        |
| PCDTBT                       | 660                        | 100            | 6.2           | -              | -             | 6.2                       | 0.98     |
| TiO <sub>2</sub> /CdS        | 520                        | 29.0           | 0.3           | 71             | 5.15          | 5.0                       | 1        |
| TiO <sub>2</sub> /PCDTBT     | 660                        | 65.35          | 0.26          | 34.65          | 2.9           | 2.5                       | 1        |
| PCDTBT/CdS                   | 520                        | 35.0           | 0.01          | 65.0           | 1.5           | 1.5                       | 1        |
|                              | 660                        | 17.8           | 0.02          | 82.2           | 0.6           | 0.6                       | 0.98     |
| TiO <sub>2</sub> /PCDTBT/CdS | 520                        | 93.6           | 0.6           | 6.4            | 1.55          | 0.75                      | 1        |
|                              | 660                        | 36.2           | 0.02          | 63.8           | 0.5           | 0.5                       | 1        |

<sup>a</sup>B is the relative amplitude of each lifetime,  $\tau_1$  and  $\tau_2$  are the components of fluorescence lifetime and  $\chi^2$  denotes the fit quality.

**Table S3** Quantum yield data for CdS and reference.

| Rhodamine 6G |                      | CdS        |                      |
|--------------|----------------------|------------|----------------------|
| Absorbance   | Area of Fluorescence | Absorbance | Area of Fluorescence |
| 0.02         | 3911447              | 0.06       | 32929665             |
| 0.03         | 5826101              | 0.1        | 5666364              |
| 0.054        | 9597795              | 0.15       | 8293685              |
| 0.07         | 13379483             | 0.17       | 9159208              |

FRET calculations (Output file of the PHOTOCHEMCAD software)

|                                                        |                          |
|--------------------------------------------------------|--------------------------|
| Donor                                                  | : CdS                    |
| Acceptor                                               | : PCDTBT                 |
| Refractive index                                       | : 2                      |
| Orientation factor                                     | : 0.66                   |
| Donor quantum yield                                    | : 0.3                    |
| Acceptor $\epsilon$ ( $\text{M}^{-1} \text{cm}^{-1}$ ) | : 39330                  |
| Wavelength for $\epsilon$                              | : 560                    |
| Low wavelength                                         | : 460                    |
| High wavelength                                        | : 650                    |
| $J$ ( $\text{M}^{-1} \text{cm}^3$ )                    | : $2.37 \times 10^{-13}$ |
| Forster distance (nm)                                  | : 3.67                   |

**Table S4** Solar cell parameters of cells by considering standard deviation using 0.1 M Na<sub>2</sub>S and 0.1 M KCl as electrolyte, exposed cell area: 0.12 to 0.15 cm<sup>2</sup>, under 1 sun illumination (AM 1.5G, 100 mW cm<sup>-2</sup>) with the listed photoanodes; all cells with both C- fabric and C-dots/C-fabric assembly as the counter electrode.

| Photoanode configuration     | Counter Electrode | V <sub>OC</sub><br>(mV) | J <sub>SC</sub><br>(mA cm <sup>-2</sup> ) | FF (%)      | η<br>(%)    |
|------------------------------|-------------------|-------------------------|-------------------------------------------|-------------|-------------|
| TiO <sub>2</sub> /PCDTBT     | C-fabric          | 382                     | 1.33                                      | 41.33       | 0.21        |
|                              |                   | 381                     | 1.4                                       | 41.25       | 0.22        |
|                              |                   | <b>383</b>              | <b>1.43</b>                               | <b>42</b>   | <b>0.23</b> |
|                              | C-dots/C-fabric   | 406                     | 1.4                                       | 38.7        | 0.22        |
|                              |                   | 405                     | 1.43                                      | 40          | 0.23        |
|                              |                   | <b>407</b>              | <b>1.45</b>                               | <b>40.7</b> | <b>0.24</b> |
| TiO <sub>2</sub> /CdS        | C-fabric          | 787                     | 17.2                                      | 38          | 5.1         |
|                              |                   | 786                     | 17.1                                      | 38.1        | 5.12        |
|                              |                   | 790                     | 17.3                                      | 38          | 5.2         |
|                              |                   | 789                     | 17.3                                      | 38.6        | 5.27        |
|                              |                   | <b>791</b>              | <b>17.4</b>                               | <b>38.5</b> | <b>5.3</b>  |
|                              | C-dots/C-fabric   | 821                     | 19                                        | 36          | 5.6         |
|                              |                   | 819                     | 19.1                                      | 36.6        | 5.72        |
|                              |                   | 818                     | 19                                        | 37.3        | 5.8         |
|                              |                   | 820                     | 19.1                                      | 37.7        | 5.91        |
|                              |                   | <b>820</b>              | <b>19.23</b>                              | <b>38.1</b> | <b>6</b>    |
| TiO <sub>2</sub> /PCDTBT/CdS | C-fabric          | 852                     | 20.14                                     | 36.1        | 6.2         |
|                              |                   | 853                     | 20.3                                      | 36.2        | 6.27        |
|                              |                   | 856                     | 20.35                                     | 36.7        | 6.3         |
|                              |                   | 854                     | 20.3                                      | 36.5        | 6.33        |
|                              |                   | <b>857</b>              | <b>20.32</b>                              | <b>36.7</b> | <b>6.4</b>  |
|                              | C-dots/C-fabric   | 873                     | 25                                        | 33.1        | 7.22        |
|                              |                   | 870                     | 25.14                                     | 33.3        | 7.28        |
|                              |                   | 868                     | 25.25                                     | 33.4        | 7.32        |
|                              |                   | 874                     | 25.21                                     | 33.6        | 7.40        |

|                              |                 |            |              |              |             |
|------------------------------|-----------------|------------|--------------|--------------|-------------|
|                              |                 | <b>877</b> | <b>25.3</b>  | <b>33.44</b> | <b>7.42</b> |
| TiO <sub>2</sub> /CdS/PCDTBT | C-fabric        | 775        | 17.13        | 36.5         | 4.85        |
|                              |                 | 774        | 17.2         | 36.5         | 4.86        |
|                              |                 | 776        | 17           | 37.14        | 4.9         |
|                              |                 | 775        | 17.21        | 37           | 4.93        |
|                              |                 | <b>776</b> | <b>17.25</b> | <b>37</b>    | <b>4.95</b> |
|                              | C-dots/C-fabric | 806        | 17.7         | 37.2         | 5.3         |
|                              |                 | 802        | 17.3         | 38.4         | 5.33        |
|                              |                 | 804        | 17.65        | 38.1         | 5.4         |
|                              |                 | 805        | 17.5         | 38.8         | 5.47        |
|                              |                 | <b>807</b> | <b>17.8</b>  | <b>38.3</b>  | <b>5.5</b>  |

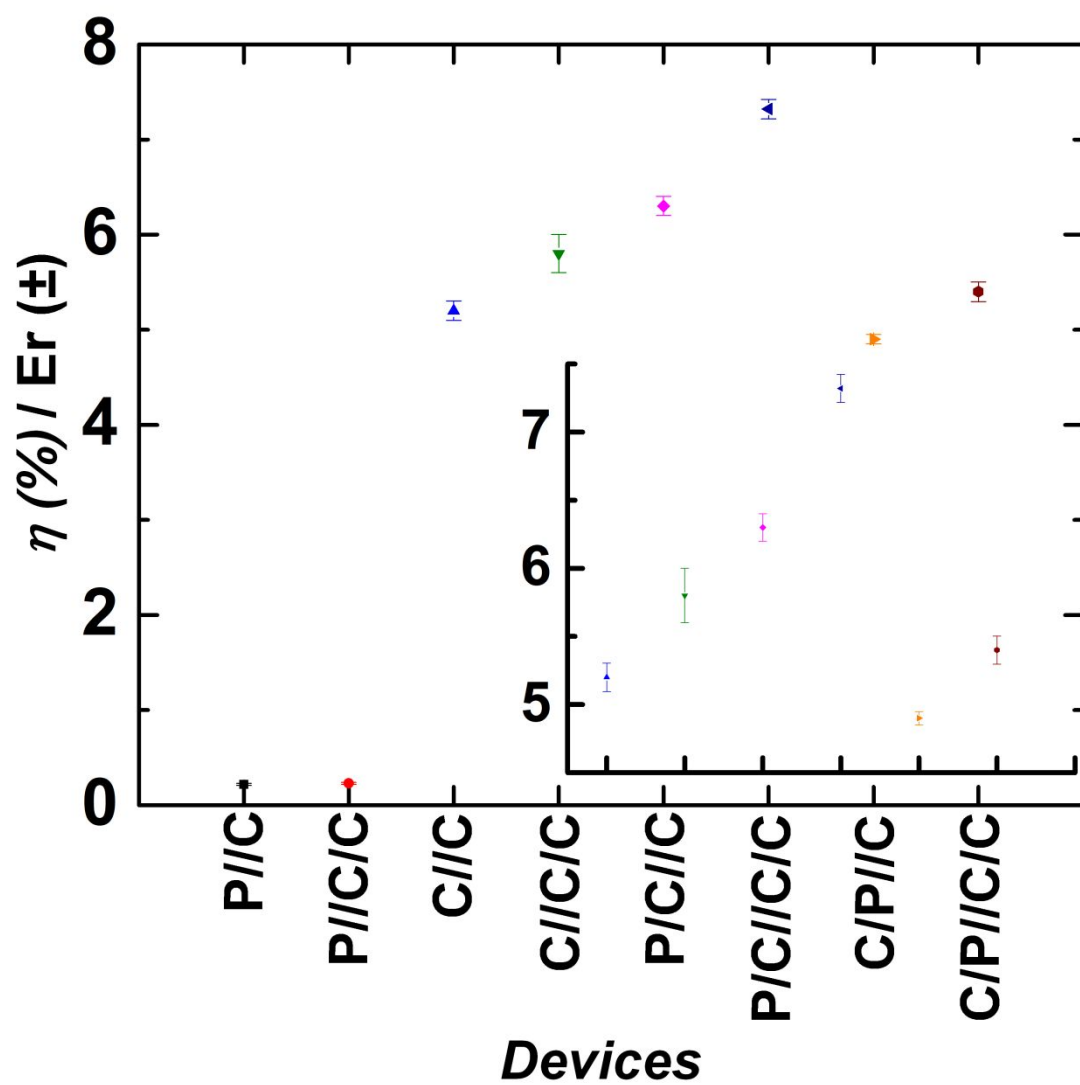

**Figure S5** Error bar plots of QDSCs devices.

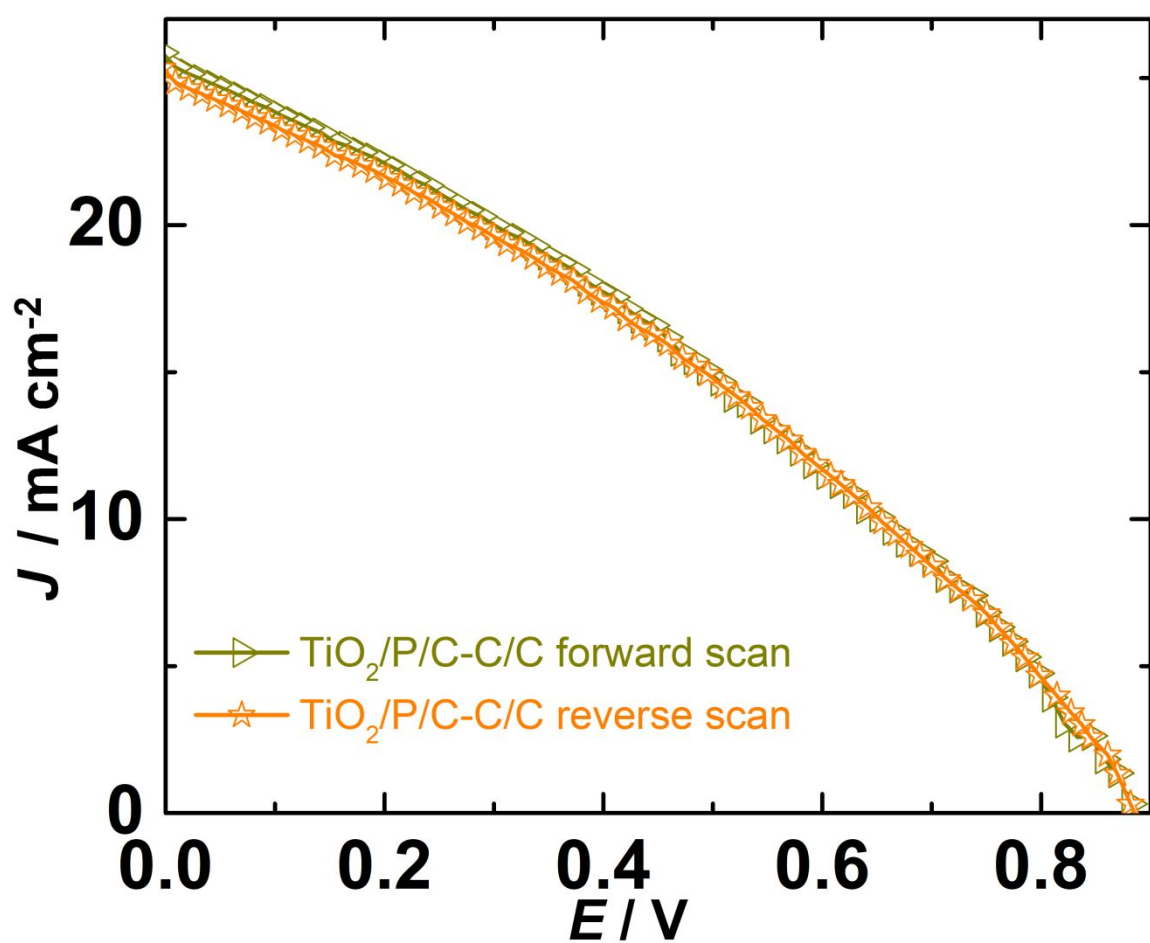

**Figure S6** J-V characteristics of  $\text{TiO}_2/\text{PCDTBT}/\text{CdS}$  (P/C), and C-dots/C-fabric (C/C) CE: C-dots/C-fabric (C/C) under 1 sun ( $100 \text{ mW cm}^{-2}$ ) illumination (AM 1.5G) in forward and reverse scan.

**Table S5** Fitting parameters for EIS spectra of symmetric cells of CE: C fabric and C-dots/C-fabric.

| Cells                            | $R_b$<br>( $\Omega \text{ cm}^2$ ) | $R_{ct}$<br>( $\Omega \text{ cm}^2$ ) | $R_{gb}$<br>( $\Omega \text{ cm}^2$ ) | $C_{dl}$<br>( $\mu\text{F cm}^{-2}$ ) | $C_{gb}$<br>( $\text{mF cm}^{-2}$ ) | $Y_o$<br>( $\text{S s}^{1/2}$ ) |
|----------------------------------|------------------------------------|---------------------------------------|---------------------------------------|---------------------------------------|-------------------------------------|---------------------------------|
| C-fabric//C-fabric               | 10                                 | 2.3                                   | 16                                    | 0.3                                   | 3.6                                 | 0.14                            |
| C-dots/C-fabric//C-dots/C-fabric | 8                                  | 1.24                                  | 9.5                                   | 2.6                                   | 4.5                                 | 0.44                            |
